# Supplementary material for: Tailoring bismuth defects in Bi2WO6 nanosheets for photocatalytic C–H activation
Source: Royal Society of Chemistry journal article supplement (doi:10.1039/d4ta01573h), 2024-01-01
Supplement: d4ta01573h1.pdf [file d4ta01573h1.pdf]

Electronic supplementary information

**Tailoring bismuth defects in Bi<sub>2</sub>WO<sub>6</sub> nanosheets  
for photocatalytic C–H activation**

Xinye Li,<sup>a,b,c, 1</sup> Luteng Luo,<sup>a, 1</sup> Hele Guo,<sup>c</sup> Bo Weng,<sup>\*c,d,e</sup> Li Sun,<sup>f</sup> Gangamalliah Velpula,<sup>f</sup> Imran Aslam,<sup>c</sup> Maarten B. J. Roeffaers,<sup>c</sup> Qinghua Chen,<sup>a,b</sup> Lingxing Zeng,<sup>\*a,b</sup> Min-Quan Yang<sup>b</sup> and Qingrong Qian<sup>\*a,b</sup>

<sup>a</sup> Engineering Research Center of Polymer Green Recycling of Ministry of Education, College of Environmental Science and Engineering, Fujian Normal University, Fuzhou, Fujian 350007, China.

<sup>b</sup> Fujian Key Laboratory of Pollution Control & Resource Reuse, Fuzhou, Fujian 350007, China.

<sup>c</sup> cMACS, Department of Microbial and Molecular Systems, KU Leuven, Celestijnenlaan 200F, 3001 Leuven, Belgium.

<sup>d</sup> CAS Key Laboratory of Urban Pollutant Conversion, Institute of Urban Environment Chinese Academy of Sciences, 1799 Jimei Road, Xiamen 361021, China

<sup>e</sup> University of Chinese Academy of Sciences, 19A Yuquan Road, Beijing 100049, China

<sup>f</sup> Division of Molecular Imaging and Photonics, Department of Chemistry, KU Leuven, Celestijnenlaan 200F, 3001 Leuven, Belgium.

<sup>1</sup> These authors contributed equally to this work.

\*Corresponding authors:

Email: bweng@iue.ac.cn; zenglingxing@fjnu.edu.cn; qrqian@fjnu.edu.cn

## Experimental

### 1.1. Synthesis of bulk-BT nanosheets

0.5 mmol  $\text{Bi}(\text{NO}_3)_3 \cdot 5\text{H}_2\text{O}$ , 0.5 mmol  $\text{Na}_2\text{WO}_4 \cdot 2\text{H}_2\text{O}$  and 0.1 g CTAB were initially dissolved in 80 mL DI water under magnetic stirring at room temperature. After being stirred for 30 min, the suspension was transferred to a 100 mL Teflon-lined autoclave and subsequently heated at 120 °C for 24 h to achieve the bulk-BT nanosheets.

### 1.2. Synthesis of ultrathin BT-48 nanosheets

0.5 g bulk-BT nanosheets were dispersed in 70 mL 1 M  $\text{HNO}_3$  solution under ultrasound for 30 min. Then above dispersions were stirring for 1.5h. Subsequently, the above suspension was added into a 100 mL Teflon-lined autoclave and heated at 120 °C for 48h. The precipitate was collected and washed with deionized water several times and dried at 80 °C.

### 1.3 Characterization

Transmission electron microscopy (TEM) images of samples were obtained using a probe-lens corrected JEOL ARM200F operating at 200 kV, equipped with a cold-field emission source and Centurion EDX detector. AFM images were recorded using Agilent 5,500 AFM (Agilent Technologies, USA). X-ray diffractometry (XRD) measurements were performed on a Stoe X-ray diffractometer using Cu  $\text{K}\alpha_1$  radiation ( $\lambda = 1.5406 \text{ \AA}$ ). Raman scattering experiments were performed on a homemade system using a TriVista<sup>TM</sup> Spectrometer System (triple grating; 900, 900 and 1800  $\text{g}/\text{mm}$ ) with a N<sub>2</sub>-cooled CCD detector from Princeton Instruments. Electron paramagnetic resonance (EPR) measurement was recorded using an MS 5000. X-ray photoelectron spectroscopy (XPS) data were recorded on a VG ESCALAB XPS System with a monochromatized Al  $\text{K}\alpha$  X-ray source (15 kV, 200 W 500  $\mu\text{m}$  pass energy = 20 eV). All binding energies were referenced to the C1s peak at 284.6 eV of surface adventitious carbon. Micromeritics ASAP2010 equipment was used to obtain the nitrogen adsorption-desorption isotherms and the Brunauer-Emmett-Teller (BET) surface areas at 77 K. The powders were degassed at 413 K to remove all surface-adsorbed contaminants before measurements. CO<sub>2</sub> adsorption isotherms measurements for all the synthetic samples were carried out using an automatic microporous physical and chemical gas adsorption analyzer (ASAP 2020 M PLUS). An ultraviolet–visible spectrophotometer (UV–vis, Lambda-950) was employed to obtain the optical properties of the samples by UV–vis diffuse reflectance spectroscopy (DRS) in the wavelength 300–800 nm with 1 nm increment, where BaSO<sub>4</sub> and black carbon were used as the references. The electrochemical analysis was carried out with an electrochemical workstation (Chenhua CHI660) in a conventional three-electrode cell. The reference electrode was an Ag/AgCl electrode, and a platinum sheet was used as the counter electrode. The electrolyte is aqueous solution of 0.01 M  $\text{K}_3[\text{Fe}(\text{CN})_6]/\text{K}_4[\text{Fe}(\text{CN})_6](1:1)$ .

### 1.4 Photocatalytic activity measurements.

All photocatalytic reactions were conducted in a 20 mL quartz reactor and with a magnetic stirring rod (500 rpm). The specific procedure was as follows: 15 mg photocatalyst, and 2.5 mL toluene prior to being saturated with molecular oxygen were loaded into the reactor and then the whole system was sealed up. The mixture was irradiated with a 150 W Xe lamp with an AM 1.5G filter or 420 nm cut-off filter to simulate the solar light spectrum. After irradiation of 4 h, the suspension was centrifuged at 10000 rpm for 10 min and the liquid was analyzed by Shimadzu GC-2010. Control photoactivity experiments with different radical scavengers, ammonium oxalate, potassium persulfate, and 1,4-benzoquinone as scavengers for photogenerated holes, photogenerated electrons, and superoxide radical species, respectively, were performed under similar reaction conditions.

### 1.5 Measurement of H<sub>2</sub>O<sub>2</sub>.

0.05 mL of 0.01 mol L<sup>-1</sup> ammonium molybdate aqueous solution and 2 mL of 0.1 mol L<sup>-1</sup> potassium iodide aqueous solution were added to 1 mL obtained solution, and kept for 30 min. The H<sub>2</sub>O<sub>2</sub> molecules reacted with iodide anions (I<sup>-</sup>) to produce triiodide anions (I<sub>3</sub><sup>-</sup>). The amount of I<sub>3</sub><sup>-</sup> was determined by means of UV-vis spectroscopy on the basis of the absorbance at 325 nm. The background is prepared by the mixture of ammonium molybdate aqueous solution and potassium iodide aqueous solution. The background + H<sub>2</sub>O<sub>2</sub> is prepared by background adding 10 µl H<sub>2</sub>O<sub>2</sub> to the solution.

### 1.6 Density functional theory (DFT) calculation details.

In this study, we performed density functional theory (DFT) calculations using the Vienna ab initio simulation package<sup>S1</sup> (VASP) with the projector augmented wave<sup>S2</sup> (PAW) and generalized gradient approximations<sup>S3</sup> (GGA) of Perdew–Burke–Ernzerhof (PBE) pseudopotentials.<sup>S4</sup> For the simulation of defect Bi<sub>2</sub>WO<sub>6</sub> nanosheet research, a 2 x 2 x 1 supercell was established. A Bi atom is removed from the supercell to construct a BT-48 model, with all the other parameters remained unchanged. The convergence criteria for energy and force were set as 10<sup>-6</sup> eV and 0.03 eV/Å, respectively. and the cutoff energy for the plane wave was 500 eV. The optimized lattice constant for the double-layer Bi<sub>2</sub>WO<sub>6</sub> nanosheet primitive cell was 5.50 Å x 5.80 Å. And a 20 Å vacuum layer was added to avoid inter-layer interactions.

1.7 The chemical equations of the toluene oxidation reaction over BT-48 are defined as follows:

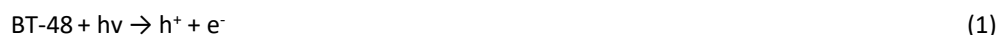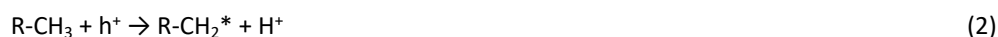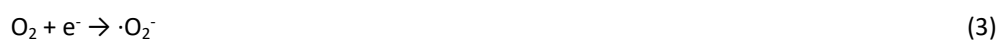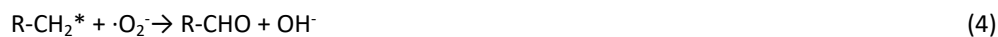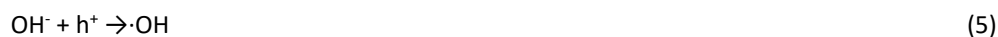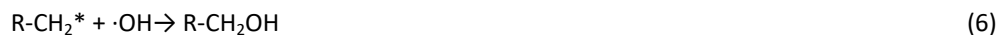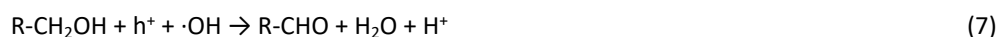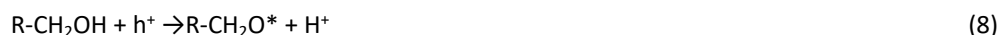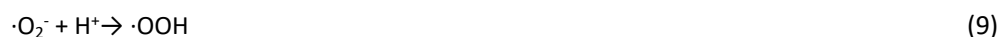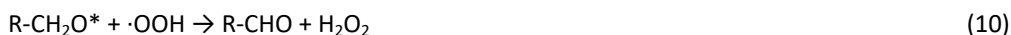

### References

- [S1] J. Hafner, *J. Comput. Chem.*, 2008, **29** (13), 2044-2078.
- [S2] J.P. Perdew, Y. Wang, *Phys. Rev. B*, 1992, **45** (23), 13244-13249.
- [S3] G. Kresse, J. Hafner, *Phys. Rev. B*, 1993, **48** (17), 13115-13118.
- [S4] J.P. Perdew, K. Burke, Y. Wang, *Phys. Rev. B*, 1996, **54** (23), 16533-16539.

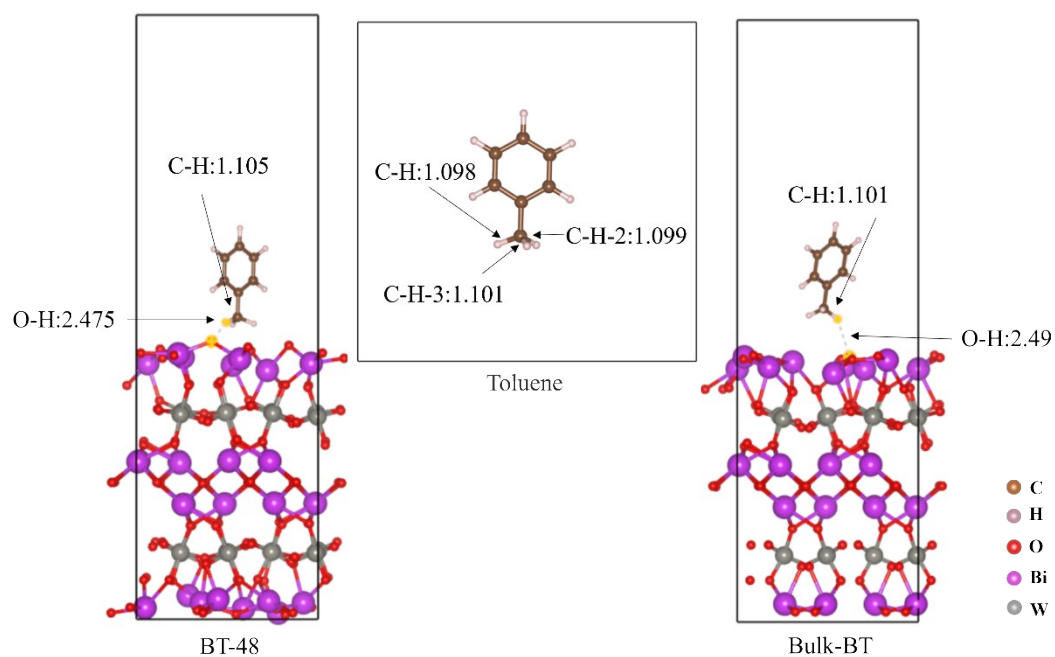

**Fig. S1** DFT-derived optimized structures and the adsorption of toluene on Bulk-BT and BT-48.

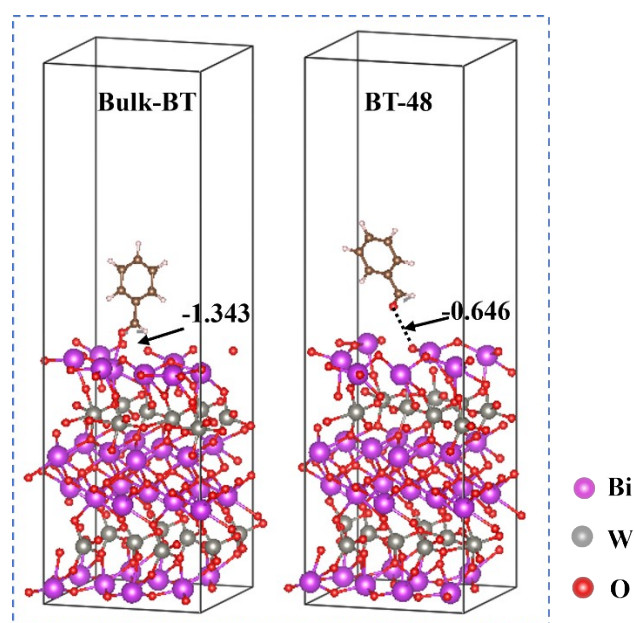

**Fig. S2** DFT-derived optimized structures and the adsorption of benzaldehyde on Bulk-BT and BT-48.

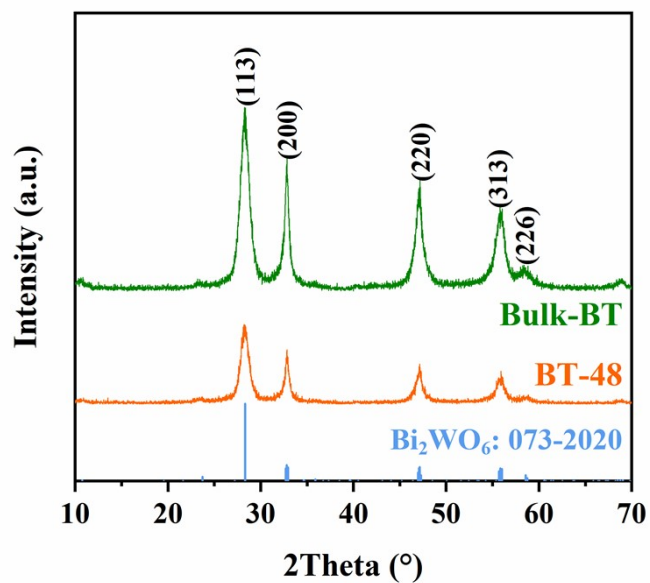

Fig. S3 XRD patterns of Bulk-BT and BT-48 samples.

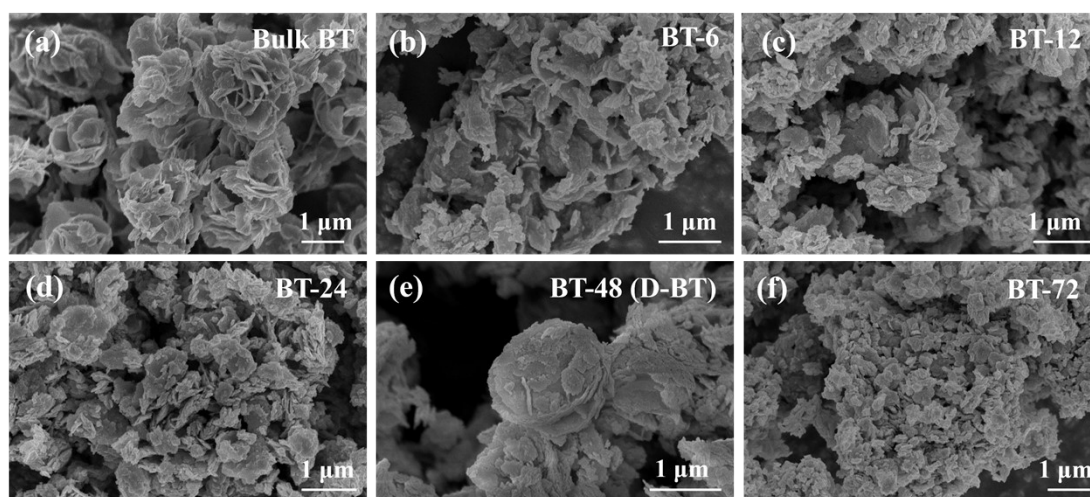

Fig. S4 SEM images of all  $\text{Bi}_2\text{WO}_6$  samples.

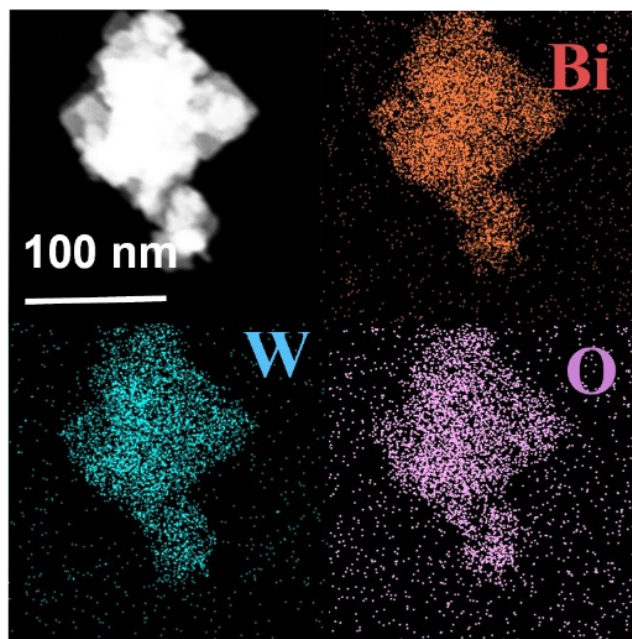

**Fig. S5** EDS spectra of BT-48 sample.

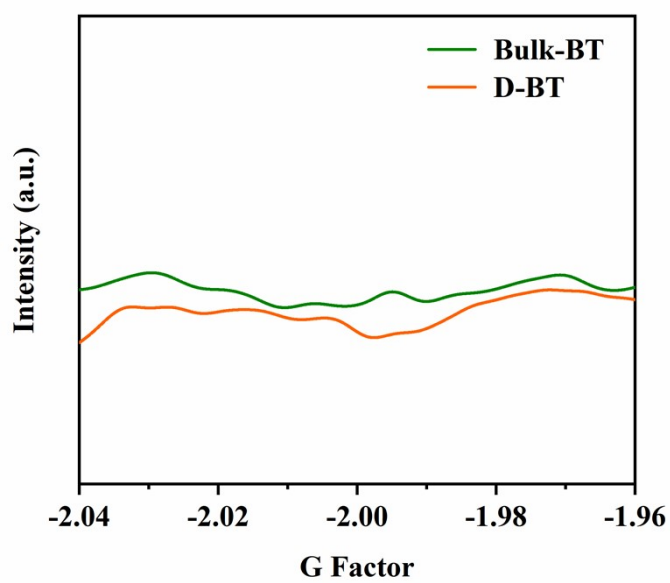

**Fig. S6** EPR spectra of Bulk-BT and BT-48 samples.

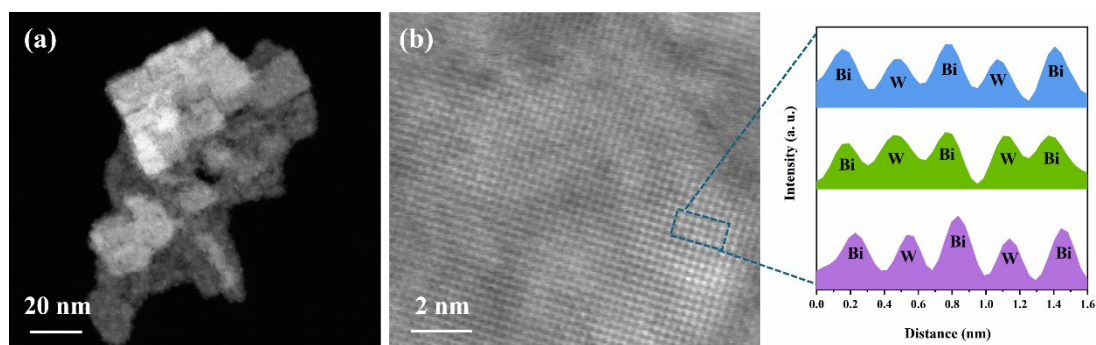

**Fig. S7** (a) TEM image, (b) HAADF-STEM image with Intensity along the blue box of Bulk-BT sample.

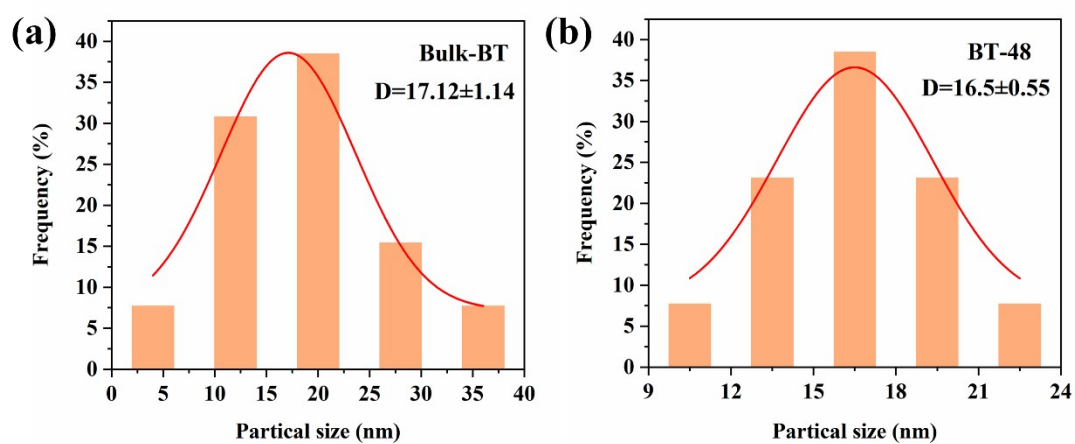

**Fig. S8** (a) The size distribution of the Bulk-BT, counted and calculated from **Fig. S7a** (b) The size distribution of the BT-48 nanosheets, counted and calculated from **Fig. 2a**.

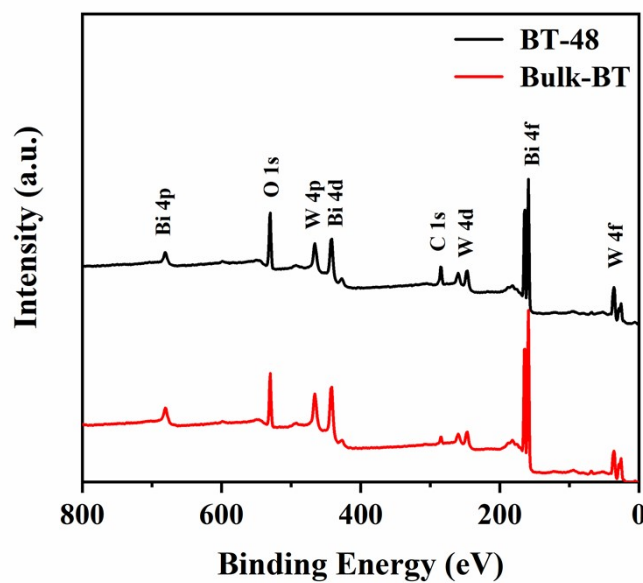

**Fig. S9** XPS survey spectra of Bulk-BT and BT-48 samples.

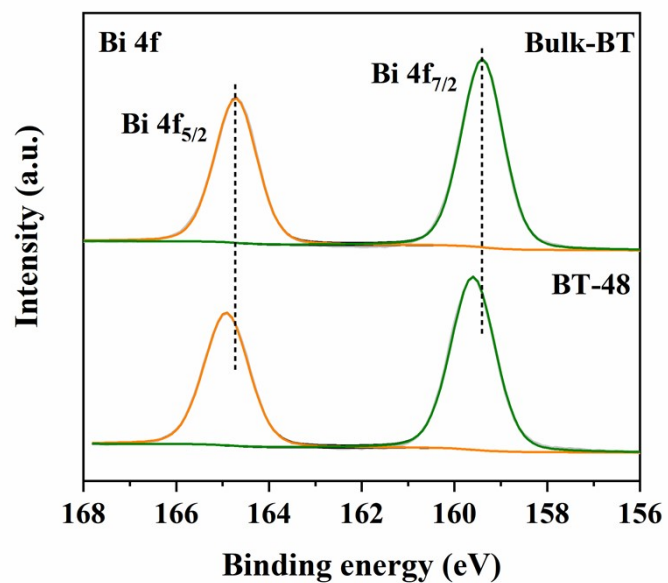

**Fig. S10** XPS spectra of Bulk-BT and BT-48 samples: Bi 4f.

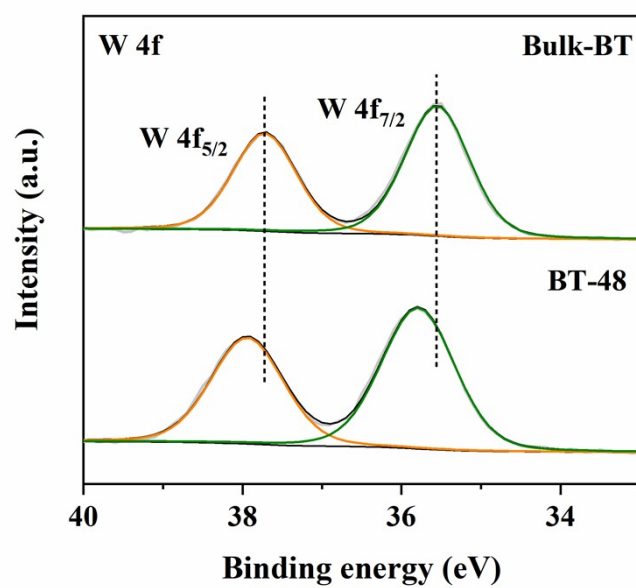

**Fig. S11** XPS spectra of Bulk-BT and BT-48 samples: W 4f.

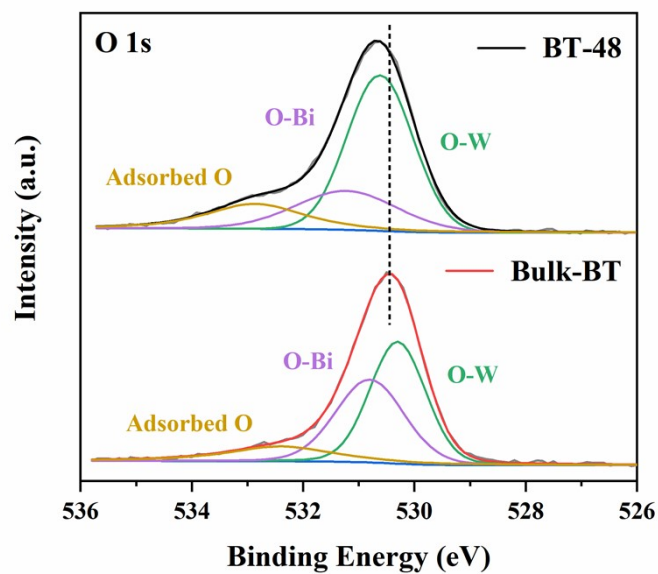

Fig. S12 XPS spectra of Bulk-BT and BT-48 samples: O 1s.

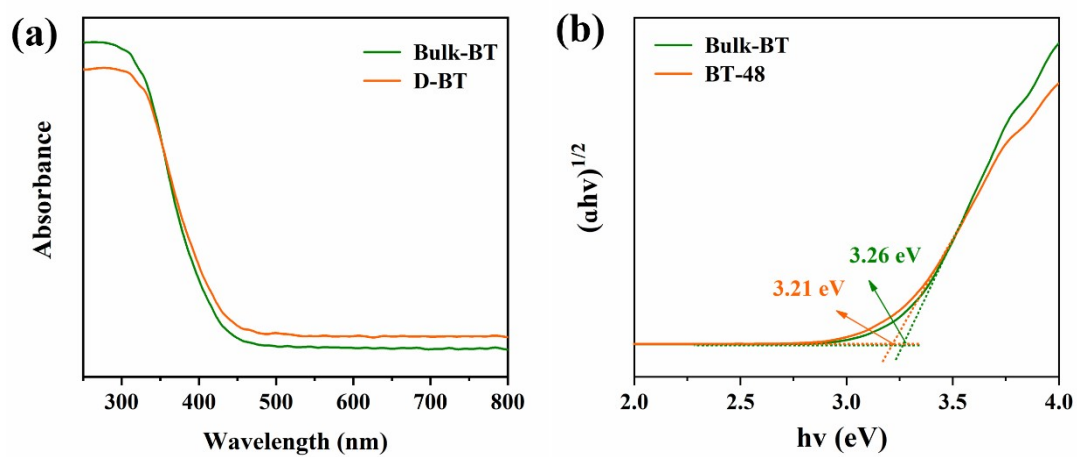

Fig. S13 UV-Vis absorption (a) and Tauc plots (b) of Bulk-BT and BT-48 samples.

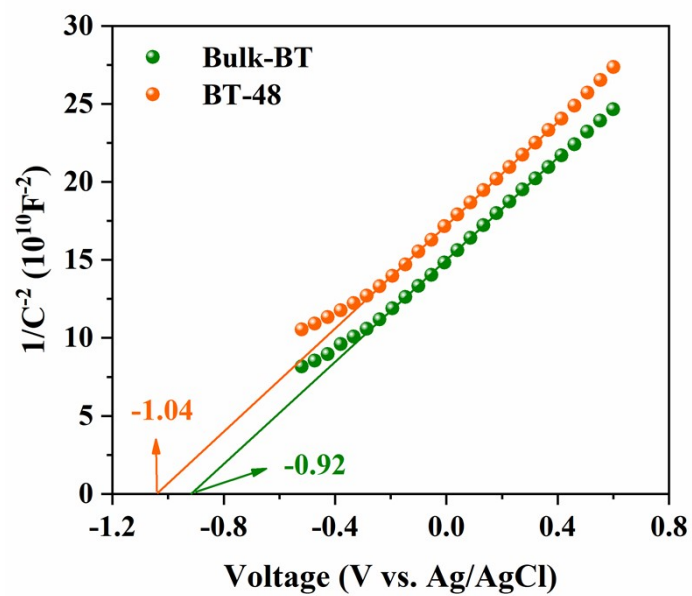

Fig. S14 Mott-Schottky plots of Bulk-BT and BT-48 samples.

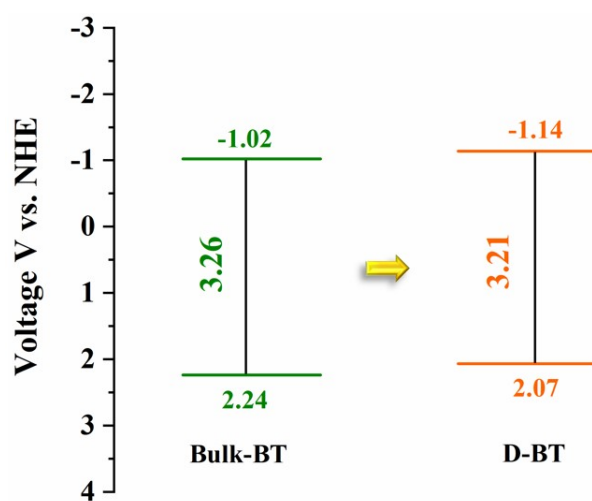

Fig. S15 Schematics of energy band alignment of Bulk-BT and BT-48 samples.

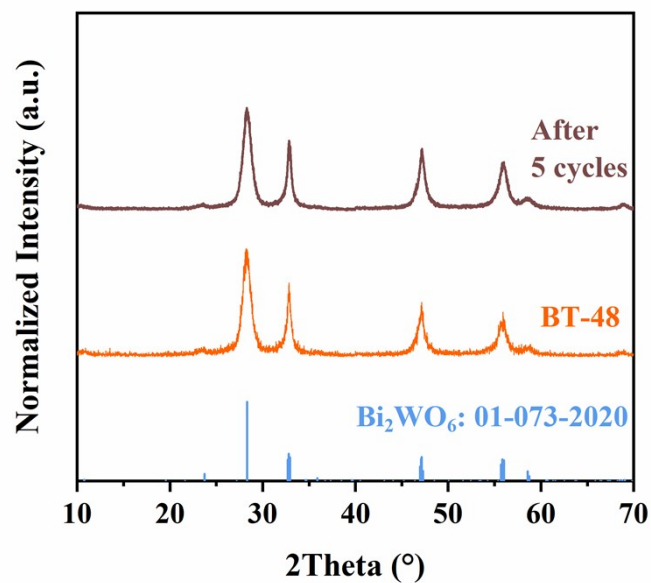

Fig. S16 XRD patterns of BT-48 before and after 5 cycles.

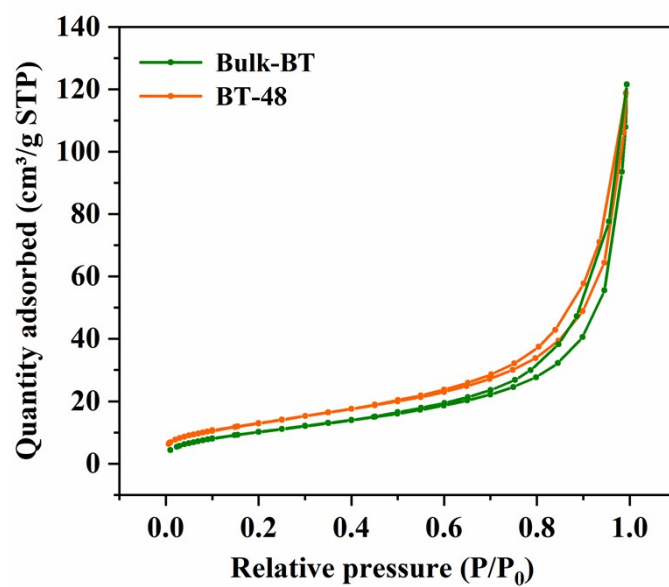

Fig. S17  $\text{N}_2$  physisorption of Bulk-BT and BT-48 samples.

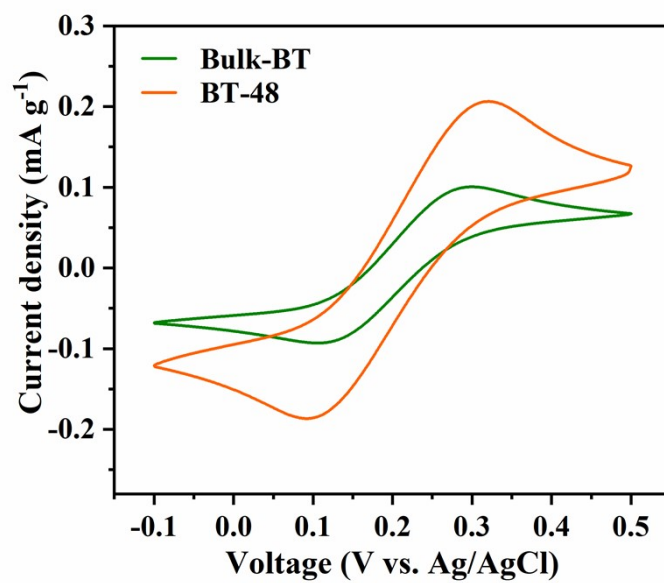

Fig. S18 Cyclic voltammetry curves of Bulk-BT and BT-48 samples.

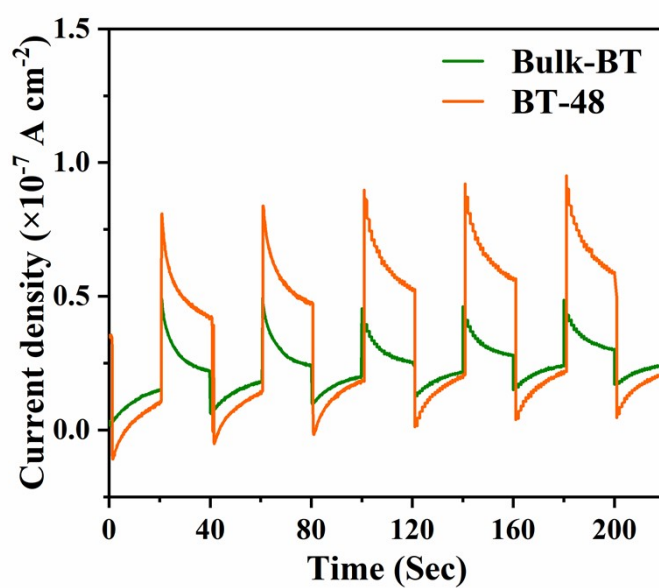

Fig. S19 Photocurrent responses of Bulk-BT and BT-48 samples.

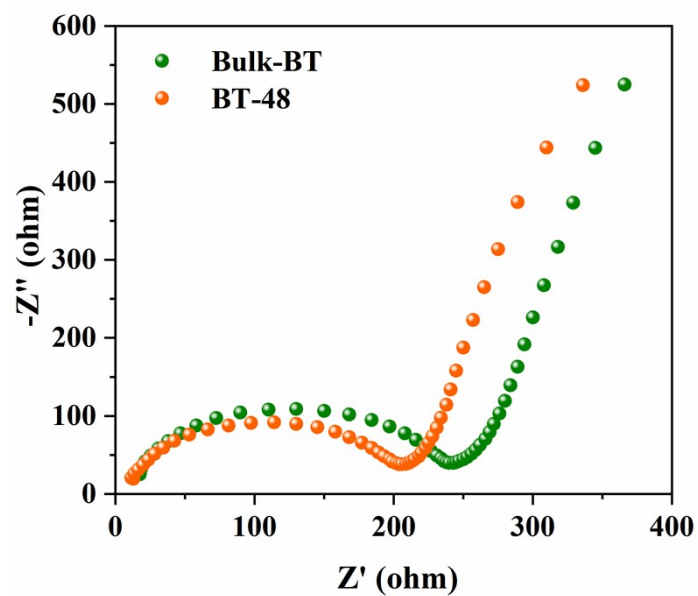

**Fig. S20** Electrochemical impedance spectroscopy spectra of Bulk-BT and BT-48 samples.

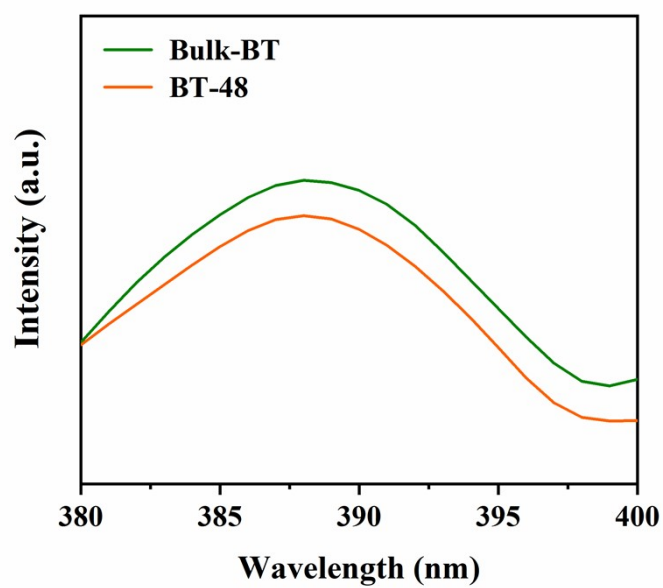

**Fig. S21** PL spectra of Bulk-BT and BT-48 samples.

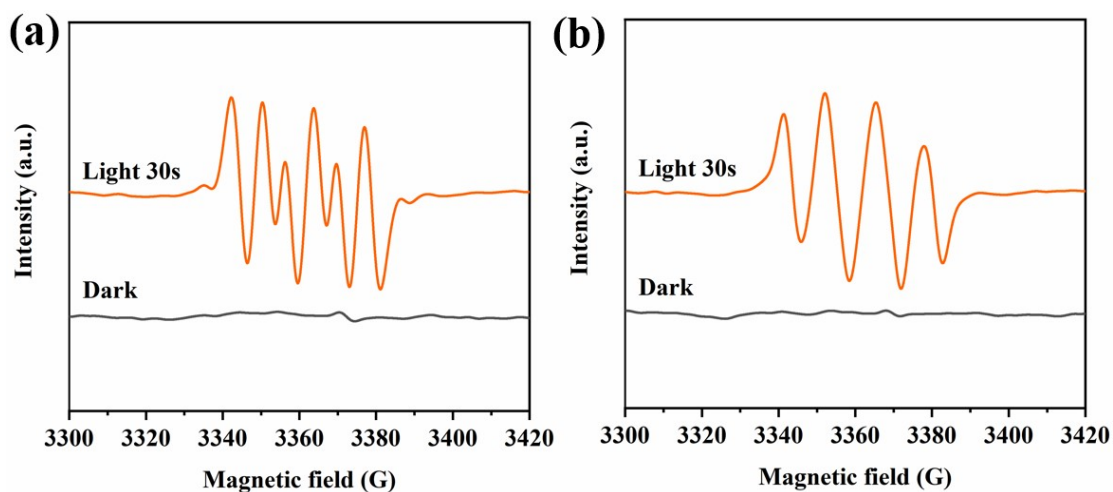

**Fig. S22** ESR spectra air for the detection of (a)  $\cdot\text{O}_2^-$  and (b)  $\cdot\text{OH}$  in BT-48 sample.

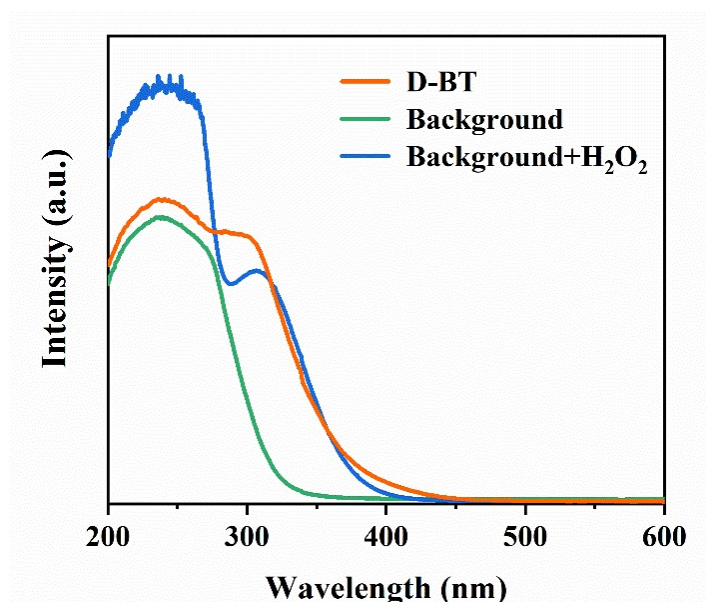

**Fig. S23** UV-Vis spectra of hydrogen peroxide production over BT-48 sample.

**Table S1** Surface atomic concentration of Bulk-BT and BT-48 samples calculated from XPS.

| Sample  | Element content (mol%) |       |      |                  |
|---------|------------------------|-------|------|------------------|
|         | Bi                     | W     | Bi/W | theoretical Bi/W |
| BT-48   | 11.93%                 | 6.7%  | 1.78 | 2                |
| Bulk-BT | 15.82%                 | 7.52% | 2.1  | 2                |

**Table S2** Comparison of the catalytic activity for benzaldehyde formulation rate over Bi<sub>2</sub>WO<sub>6</sub>-based photocatalysts.

## References

| Catalysts                                                         | Production rate (μmol g <sup>-1</sup> h <sup>-1</sup> ) | Light source       | atmosphere     | Stability (h) | Selectively (%) | References |
|-------------------------------------------------------------------|---------------------------------------------------------|--------------------|----------------|---------------|-----------------|------------|
| V <sub>Bi</sub> -Bi <sub>2</sub> WO <sub>6</sub>                  | 6781                                                    | Simulated sunlight | O <sub>2</sub> | 20            | 96              | This work  |
| Pd/Bi <sub>2</sub> WO <sub>6</sub>                                | 1140                                                    | visible-light      | O <sub>2</sub> | 35            | 92              | S1         |
| TiO <sub>2</sub> /Bi <sub>2</sub> MoO <sub>6</sub>                | 1037                                                    | visible-light      | O <sub>2</sub> | 15            | 97              | S2         |
| Fe/Bi <sub>2</sub> WO <sub>6</sub>                                | 1304                                                    | visible-light      | O <sub>2</sub> | 25            | 97              | S3         |
| Bi <sub>2</sub> W <sub>0.3</sub> Mo <sub>0.7</sub> O <sub>6</sub> | 1663                                                    | visible-light      | O <sub>2</sub> | 20            | 91              | S4         |
| Flower-like Bi <sub>2</sub> WO <sub>6</sub>                       | 464                                                     | visible-light      | O <sub>2</sub> | 25            | 96              | S5         |
| 4%Pt/2%Ta-Bi <sub>2</sub> WO <sub>6</sub>                         | 675                                                     | visible-light      | Ar             | 30            | 99              | S6         |
| Bi <sub>2</sub> WO <sub>6</sub>                                   | 763                                                     | simulated sunlight | O <sub>2</sub> | 60            | 100             | S7         |
| Bi <sub>2</sub> WO <sub>x</sub>                                   | 2162                                                    | visible-light      | O <sub>2</sub> | 30            | 100             | S8         |
| V <sub>W</sub> -Bi <sub>2</sub> WO <sub>6</sub>                   | 3474                                                    | simulated sunlight | O <sub>2</sub> | 40            | >99             | S9         |
| Bi <sub>2</sub> WO <sub>6</sub> /ZnS                              | 1000                                                    | visible-light      | Air            | 30            | >99             | S10        |
| Bi <sub>2</sub> WO <sub>6</sub> /CdS                              | 2200                                                    | visible-light      | Air            | 30            | >99             | S10        |

[S1] B. Yuan, B. Zhang, Z. Wang, S. Lu, J. Li, Y. Liu, C. Li, *Chin. J. Catal.*, 2017, **38**, 440-446.

[S2] L. N. Song, F. Ding, Y. K. Yang, D. Ding, L. Chen, C. T. Au and S. F. Yin, *ACS Sustain. Chem. Eng.*, 2018, **6**, 17044-17050.

[S3] X. X. Deng, S. Tian, Z. M. Chai, Z. J. Bai, Y. X. Tan, L. Chen, J. K. Guo, S. Shen, M. Q. Cai, C. T. Au and S. F. Yin, *Ind. Eng. Chem. Res.*, 2020, **59**, 13528-13538.

[S4] K. Zhang, H. Chen, Y. Liu, J. Deng, L. Jing, A. Rastegarpanah, W. Pei, Z. Han and H. Dai, *Appl. Catal. B: Environ.*, 2022, **315**, 121545.

[S5] Y. Liu, L. Chen, Q. Yuan, J. He, C. T. Au and S. F. Yin, *Chem. Commun.*, 2016, **52**, 1274-1277.

- [S6] Z. Shen, Y. Hu, Q. Pan, C. Huang, B. Zhu, W. Xia, H. Wang, J. Yue, M. Muhler, G. Zhao, X. Wang and X. Huang, *Appl. Surf. Sci.*, 2022, **571**, 151370.
- [S7] Q. Gu, K. Zhang, P. Jiang, Y. Shen, Y. Leng, P. Zhang and P. T. Wai, *Mol. Catal.*, 2021, **515**, 111932.
- [S8] X. Cao, Z. Chen, R. Lin, W. C. Cheong, S. Liu, J. Zhang, Q. Peng, C. Chen, T. Han, X. Tong, Y. Wang, R. Shen, W. Zhu, D. Wang and Y. Li, , *Nat. Catal.*, 2018, **1**, 704-710.
- [S9] H. Huang, C. Zhou, X. Jiao, H. Yuan, J. Zhao, C. He, J. Hofkens, M. B. J. Roeffaers, J. Long and J. A. Steele, *ACS Catal.*, 2019, **10**, 1439-1443.
- [S10] E. Safaei and S. Mohebbi, *J. Photochem. Photobiol. A Chem.*, 2019, **371**, 173-181.
